# Supplementary material for: Which parameters to use for sleep quality monitoring in team sport athletes? A systematic review and meta-analysis
Source: PubMed Central journal article supplement — BMJ Open Sport Exerc Med. 2019 Feb 5;5(1):e000475. doi: 10.1136/bmjsem-2018-000475 (PMC6340585; doi:10.1136/bmjsem-2018-000475), 2019-02-05
Supplement: bmjsem-2018-000475supp001.pdf [file bmjsem-2018-000475supp001.pdf]

|          | 1993 | 1999 | 2002 | 2003 | 2004 | 2007 | 2008 | 2009 | 2010 | 2011 | 2012 | 2013 | 2014 | 2015 | 2016 | 2017 |           |
|----------|------|------|------|------|------|------|------|------|------|------|------|------|------|------|------|------|-----------|
| <b>n</b> | 1    | 1    | 1    | 1    | 1    | 3    | 2    | 2    | 3    | 1    | 4    | 9    | 5    | 11   | 14   | 18   | <b>77</b> |
| <b>%</b> | 1%   | 1%   | 1%   | 1%   | 1%   | 4%   | 3%   | 3%   | 4%   | 1%   | 5%   | 12%  | 6%   | 14%  | 18%  | 23%  | 100%      |

**56%**

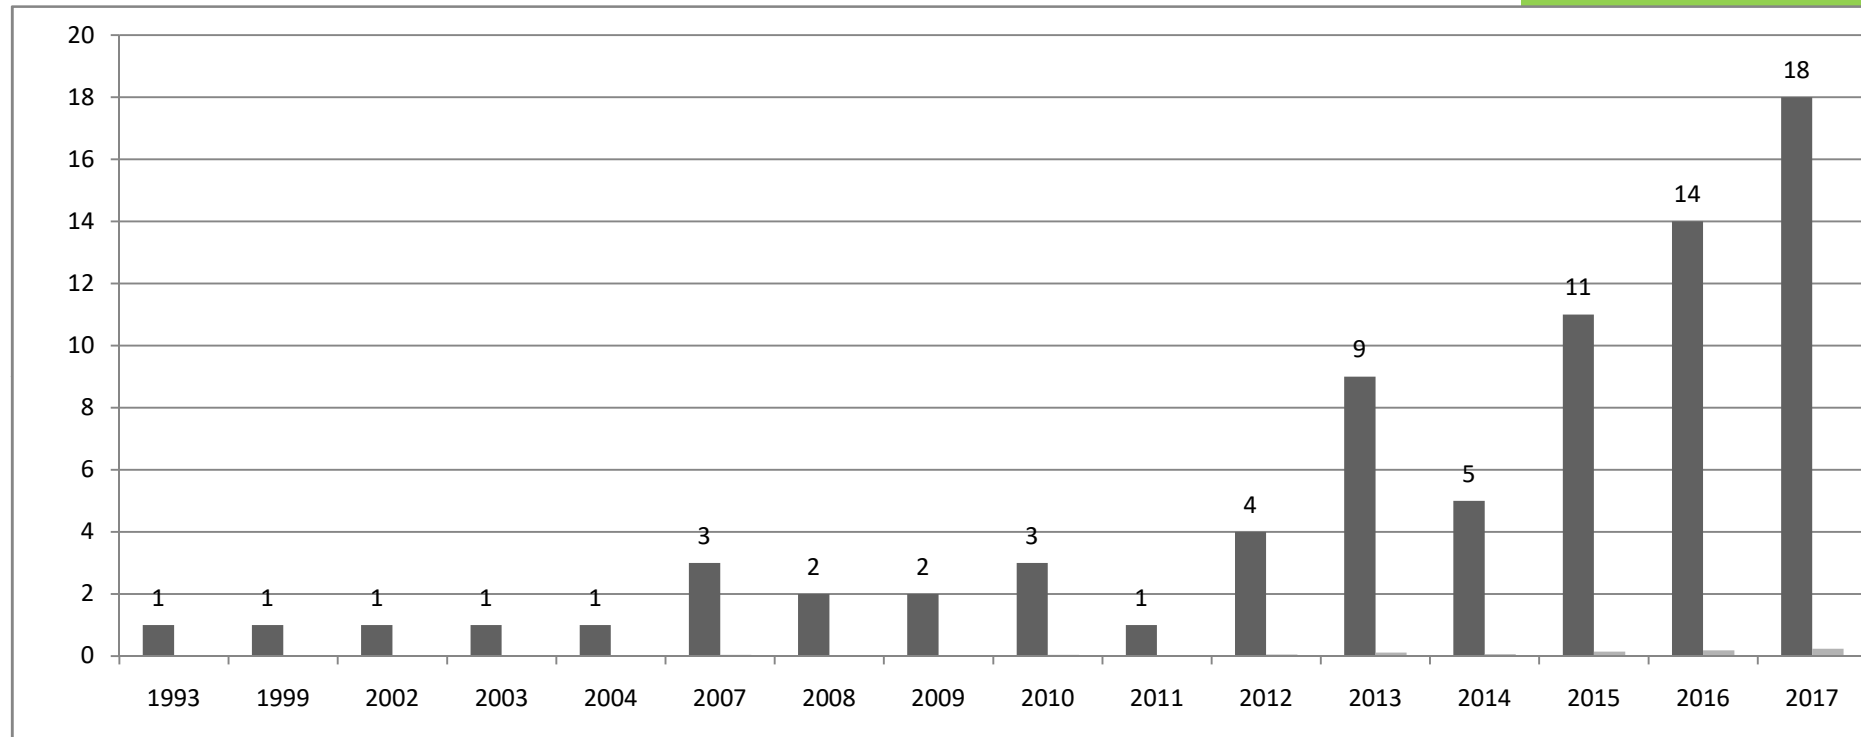

| <b>COUNTRIES</b>                | <b>n</b>  | <b>%</b>   |
|---------------------------------|-----------|------------|
| <b>AUSTRALIA</b>                | <b>34</b> | <b>44%</b> |
| <b>UNITED KINGDOM</b>           | <b>13</b> | <b>17%</b> |
| <b>UNITED STATES OF AMERICA</b> | <b>10</b> | <b>13%</b> |
| <b>QATAR</b>                    | <b>8</b>  | <b>10%</b> |
| FRANCE                          | 7         | 9%         |
| GERMANY                         | 6         | 8%         |
| THE NETHERLANDS                 | 6         | 8%         |
| TUINISIA                        | 5         | 6%         |
| JAPAN                           | 4         | 5%         |
| SWITZERLAND                     | 4         | 5%         |
| HONG KONG                       | 3         | 4%         |
| ITALY                           | 3         | 4%         |
| SOUTH AFRICA                    | 3         | 4%         |
| SWEDEN                          | 3         | 4%         |
| ALGERIA                         | 2         | 3%         |
| BRAZIL                          | 2         | 3%         |
| CHINA                           | 2         | 3%         |
| FINLAND                         | 2         | 3%         |
| NEW ZELAND                      | 2         | 3%         |
| SINGAPORE                       | 2         | 3%         |
| ARGENTINA                       | 1         | 1%         |
| BOLIVIA                         | 1         | 1%         |
| CANADA                          | 1         | 1%         |
| GREECE                          | 1         | 1%         |
| ISRAEL                          | 1         | 1%         |
| NORTHERN IRELAND                | 1         | 1%         |
| SPAIN                           | 1         | 1%         |
