# Supplementary material for: Which parameters to use for sleep quality monitoring in team sport athletes? A systematic review and meta-analysis
Source: PubMed Central journal article supplement — BMJ Open Sport Exerc Med. 2019 Feb 5;5(1):e000475. doi: 10.1136/bmjsem-2018-000475 (PMC6340585; doi:10.1136/bmjsem-2018-000475), 2019-02-05
Supplement: bmjsem-2018-000475supp002.pdf [file bmjsem-2018-000475supp002.pdf]

|                      | A | B | C | D | E |
|----------------------|---|---|---|---|---|
| 1993 Hill [24]       | 1 | 1 | 1 | 2 | 1 |
| 1999 Hoffman [25]    | 1 | 1 | 1 | 2 | 1 |
| 2002 Cardinali [26]  | 1 | 2 | 1 | 2 | 1 |
| 2003 George [95]     | 1 | 2 | 1 | 2 | 1 |
| 2004 Richmond [27]   | 1 | 1 | 1 | 1 | 1 |
| 2007 Polman [28]     | 1 | 1 | 1 | 2 | 1 |
| 2007 Richmond [29]   | 1 | 1 | 2 | 1 | 1 |
| 2007 Zerguini [30]   | 1 | 2 | 1 | 0 | 1 |
| 2008 Coutts [31]     | 1 | 1 | 2 | 2 | 1 |
| 2008 Leiper [32]     | 1 | 2 | 0 | 2 | 1 |
| 2009 Brand [33]      | 1 | 1 | 2 | 2 | 1 |
| 2009 Wilson [34]     | 1 | 1 | 2 | 2 | 1 |
| 2010 Brand [35]      | 1 | 1 | 2 | 2 | 1 |
| 2010 Killen [36]     | 1 | 1 | 2 | 2 | 1 |
| 2010 Rice [37]       | 1 | 2 | 1 | 2 | 1 |
| 2011 Mah [38]        | 1 | 1 | 2 | 2 | 1 |
| 2012 Brink [39]      | 1 | 2 | 2 | 2 | 1 |
| 2012 Chamari [40]    | 1 | 1 | 1 | 2 | 1 |
| 2012 Herrera [41]    | 1 | 1 | 2 | 2 | 1 |
| 2012 Zhao [42]       | 1 | 1 | 2 | 2 | 1 |
| 2013 Bahnert [96]    | 1 | 1 | 2 | 2 | 1 |
| 2013 Beaven [43]     | 1 | 1 | 1 | 2 | 1 |
| 2013 Buchheit [44]   | 1 | 1 | 1 | 2 | 1 |
| 2013 Di Fronso [45]  | 1 | 1 | 2 | 2 | 1 |
| 2013 Gustin [46]     | 1 | 1 | 1 | 2 | 1 |
| 2013 Haddad [47]     | 1 | 1 | 2 | 2 | 1 |
| 2013 McNamara [48]   | 1 | 1 | 2 | 2 | 1 |
| 2013 Roach [49]      | 1 | 1 | 2 | 2 | 1 |
| 2013 Thompson [50]   | 1 | 1 | 2 | 2 | 1 |
| 2014 Abdelmalek [51] | 1 | 1 | 1 | 2 | 1 |
| 2014 Abeln [52]      | 1 | 1 | 2 | 2 | 1 |
| 2014 Fowler [97]     | 1 | 0 | 2 | 2 | 1 |
| 2014 Robey [53]      | 1 | 1 | 2 | 2 | 1 |
| 2014 Tulppo [54]     | 1 | 1 | 1 | 2 | 1 |
| 2015 Buchheit [55]   | 1 | 1 | 1 | 2 | 1 |
| 2015 Fowler [97]     | 1 | 1 | 2 | 2 | 1 |
| 2015 Juliff [56]     | 1 | 1 | 2 | 2 | 1 |
| 2015 Lastella [58]   | 1 | 1 | 2 | 2 | 1 |
| 2015 Laux [59]       | 1 | 1 | 2 | 2 | 1 |
| 2015 Moreno [60]     | 1 | 0 | 2 | 2 | 1 |
| 2015 Noon [61]       | 1 | 1 | 1 | 2 | 1 |
| 2015 Shearer [62]    | 1 | 1 | 2 | 2 | 1 |
| 2015 Souissi [63]    | 1 | 1 | 1 | 2 | 1 |
| 2015 Staunton [64]   | 1 | 1 | 1 | 1 | 1 |

|                            |   |   |   |   |   |
|----------------------------|---|---|---|---|---|
| 2015 Thorpe [65]           | 1 | 1 | 1 | 2 | 1 |
| 2016 Andrade [66]          | 1 | 1 | 2 | 2 | 1 |
| 2016 Buchheit [67]         | 1 | 1 | 1 | 2 | 1 |
| 2016 Dennis [68]           | 1 | 1 | 1 | 2 | 1 |
| 2016 Dobrosielski [98]     | 1 | 1 | 2 | 2 | 1 |
| 2016 Eagles [99]           | 1 | 1 | 2 | 2 | 1 |
| 2016 Fessi [69]            | 1 | 1 | 2 | 2 | 1 |
| 2016 Fowler [70]           | 1 | 1 | 2 | 2 | 1 |
| 2015 Fullagar [72]         | 1 | 1 | 1 | 2 | 1 |
| 2016 Fullagar [71]         | 1 | 1 | 2 | 2 | 1 |
| 2016 Fullagar [73]         | 1 | 1 | 1 | 2 | 1 |
| 2016 Gallo [74]            | 1 | 1 | 2 | 2 | 1 |
| 2016 Gouttebarger [76]     | 1 | 1 | 2 | 2 | 1 |
| 2016 Gouttebarger [75]     | 1 | 1 | 2 | 2 | 1 |
| 2016 Gouttebarger [77]     | 1 | 1 | 2 | 2 | 1 |
| 2017 Caia [78]             | 1 | 1 | 1 | 2 | 1 |
| 2017 Fowler [80]           | 1 | 1 | 2 | 2 | 1 |
| 2017 Fowler [79]           | 1 | 1 | 2 | 2 | 1 |
| 2017 Fuller [81]           | 1 | 1 | 2 | 2 | 1 |
| 2017 Gouttebarger [82]     | 1 | 1 | 2 | 2 | 1 |
| 2017 Ihsan [83]            | 1 | 1 | 2 | 2 | 1 |
| 2017 Jones [84]            | 1 | 1 | 2 | 2 | 1 |
| 2017 Kiliç [85]            | 1 | 1 | 2 | 2 | 1 |
| 2017 Kim [86]              | 1 | 1 | 1 | 2 | 1 |
| 2017 Li [87]               | 1 | 1 | 2 | 2 | 1 |
| 2017 O'Donnell [88]        | 1 | 1 | 2 | 2 | 1 |
| 2017 Pitchford [100]       | 1 | 1 | 1 | 2 | 1 |
| 2017 Van Ryswyk [89]       | 1 | 1 | 1 | 2 | 1 |
| 2017 Staunton [90]         | 1 | 1 | 1 | 2 | 1 |
| 2017 Thorpe [91]           | 1 | 1 | 1 | 2 | 1 |
| 2017 Tsunoda [92]          | 1 | 1 | 2 | 2 | 1 |
| 2017 Tuomilehto [93]       | 1 | 1 | 2 | 2 | 1 |
| 2017 Whitworth-Turner [94] | 1 | 1 | 2 | 2 | 1 |

|   |                        |                                          | Scoring |        |     |
|---|------------------------|------------------------------------------|---------|--------|-----|
|   | Criteria               | Definition                               | 0       | 1      | 2   |
| A | Peer reviewed          | Study published in peer-reviewed journal | No      | Yes    | -   |
| B | Number of participants | Number of participants included in study | <5      | 6-30   | >31 |
| C | Population defined     | Age, gender, sport, experience time was  | No      | Partly | Yes |
| D | Experimental design    | Experimental design the study period was | No      | Partly | Yes |
| E | Sleep parameters       | The sleep parameters are described       | No      | Yes    |     |
